# Supplementary material for: Nitrogen and Phosphorus Loading Characteristics of Agricultural Non-Point Sources in the Tuojiang River Basin
Source: MDPI journal article supplement (doi:10.3390/w15193503), 2023-10-07
Supplement: s1 [file s1]

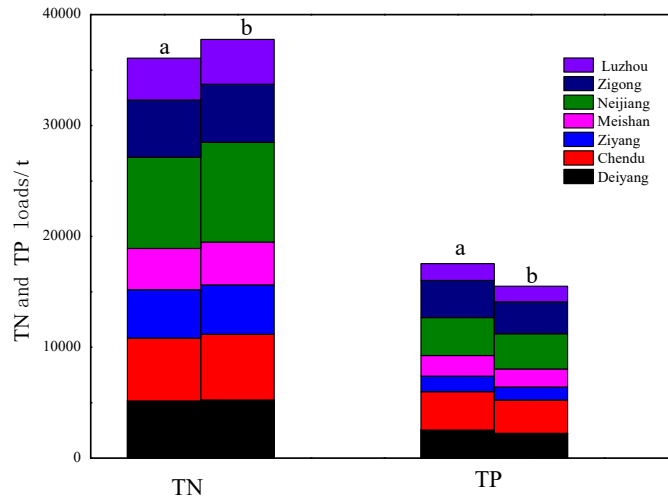

Figure S1 TN and TP loads of each city in the Tuojiang River Basin, a): 2019; b): 2018

Table S1 List of abbreviation in the equations

| Equation | Parameters |                                                                              |          |                                                              |           |                                                                           |
|----------|------------|------------------------------------------------------------------------------|----------|--------------------------------------------------------------|-----------|---------------------------------------------------------------------------|
| Eq.(1)   | FN         | nitrogen emission of planting source (t)                                     | NF       | the amount of nitrogen fertilizer (t)                        | CF        | the amount of compound fertilizer (t)                                     |
| Eq.(2)   | FP         | phosphorus emission of planting source (t)                                   | NP       | the amount of phosphate fertilizer (t)                       |           |                                                                           |
| Eq.(3)   | FNR        | the total nitrogen into the river(t)                                         | $\eta$   | the loss coefficients into the river                         |           |                                                                           |
| Eq.(4)   | FPR        | the total phosphorus into the river (t)                                      |          |                                                              |           |                                                                           |
| Eq.(5)   | DW         | TN and TP emissions of rural living source (kg)                              | P        | the rural population                                         | $C_1$     | TN and TP emissions in domestic sewage (g/(person day))                   |
|          | $C_2$      | TN and TP content in solid household waste of rural residents                | $\rho$   | the solid waste emission coefficient (kg/(person year))      | $C_3$     | TN and TP emissions in human manure and urine (g/(person day))            |
| Eq.(6)   | DWR        | the amount of TN and TP entering the river from the rural living source (kg) | $\phi$   | domestic sewage treatment rate                               | $\mu$     | the coefficient of domestic sewage entering the river                     |
|          | $\lambda$  | the coefficient of household waste entering the river                        | $\beta$  | the loss coefficient of human excrement into the river       |           |                                                                           |
| Eq.(7)   | $LF_i$     | TN and TP emission of poultry and livestock farming source (kg)              | $Q_k$    | the breeding quantity of the k kind of livestock (head)      | $R_{ik}$  | the TN or TP emission coefficient of type k livestock (kg/head a)         |
| Eq.(8)   | $LFR_i$    | the amount of TN/ TP entering the river of livestock farming source (kg)     | $\alpha$ | the loss coefficient of poultry and livestock farming source |           |                                                                           |
| Eq.(9)   | $GWFi$     | the gray water footprint of TN or TP ( $m^3/a$ )                             | $L_i$    | the non-point source pollution load of TN or TP (kg/a)       | $C_{max}$ | the maximum acceptable concentration of nitrogen and phosphorus pollution |
|          | $C_{nat}$  | the natural background value of TN and TP in the basin                       |          |                                                              |           |                                                                           |
| Eq.(10)  | TR         | total amount of surface water resources                                      |          |                                                              |           |                                                                           |

Table S2 The proportion of TN and TP load in rural living source of each city in the basin

| City    | Total amount | 2019 TN | 2018 TN | 2019 TP | 2018 TP |
|---------|--------------|---------|---------|---------|---------|
|         | /Proportion  | Load/t  | Load/t  | Load/t  | Load/t  |
| Deiyang | Total amount | 1018.53 | 1040.17 | 154.34  | 157.61  |
|         | Proportion/% | 9.08    | 8.88    | 9.08    | 8.88    |
| Chengdu | Total amount | 1665.87 | 2036.38 | 252.43  | 308.57  |
|         | Proportion/% | 14.85   | 17.39   | 14.85   | 17.39   |
| Ziyang  | Total amount | 2219.28 | 2228.10 | 336.28  | 337.62  |

|          |              |         |         |        |        |
|----------|--------------|---------|---------|--------|--------|
|          | Proportion/% | 19.78   | 19.02   | 19.78  | 19.02  |
| Meishan  | Total amount | 1108.23 | 1138.87 | 167.93 | 172.57 |
|          | Proportion/% | 9.88    | 9.72    | 9.88   | 9.72   |
| Neijiang | Total amount | 2331.61 | 2360.87 | 353.30 | 357.74 |
|          | Proportion/% | 20.79   | 20.16   | 20.79  | 20.16  |
| Zigong   | Total amount | 1773.70 | 1815.06 | 268.77 | 275.03 |
|          | Proportion/% | 15.81   | 15.50   | 15.81  | 15.50  |
| Luzhou   | Total amount | 1100.39 | 1093.24 | 166.74 | 165.66 |
|          | Proportion/% | 9.81    | 9.33    | 9.81   | 9.33   |

Table S3 The proportion of TN and TP load in poultry and livestock farming source of each city in the basin

| City     | Total amount<br>/Proportion | 2019 TN<br>Load/t | 2018 TN<br>Load/t | 2019 TP<br>Load/t | 2018 TP<br>Load/t |
|----------|-----------------------------|-------------------|-------------------|-------------------|-------------------|
| Deiyang  | Total amount                | 1639.00           | 1737.00           | 402.00            | 426.00            |
|          | Proportion/%                | 16.62             | 15.22             | 16.64             | 15.23             |
| Chengdu  | Total amount                | 1470.00           | 1951.00           | 360.00            | 478.00            |
|          | Proportion/%                | 14.91             | 17.10             | 14.90             | 17.08             |
| Ziyang   | Total amount                | 1828.00           | 2390.00           | 448.00            | 586.00            |
|          | Proportion/%                | 18.54             | 20.95             | 18.54             | 20.94             |
| Meishan  | Total amount                | 759.00            | 849.00            | 186.00            | 208.00            |
|          | Proportion/%                | 7.70              | 7.44              | 7.70              | 7.43              |
| Neijiang | Total amount                | 1787.00           | 1911.00           | 438.00            | 469.00            |
|          | Proportion/%                | 18.12             | 16.75             | 18.13             | 16.76             |
| Zigong   | Total amount                | 1275.00           | 1398.00           | 312.00            | 343.00            |
|          | Proportion/%                | 12.93             | 12.25             | 12.91             | 12.26             |
| Luzhou   | Total amount                | 1102.00           | 1174.00           | 270.00            | 288.00            |
|          | Proportion/%                | 11.18             | 10.29             | 11.18             | 10.29             |

Table S4 TN and TP GWF of planting source in the TJRB ( $10^9 \text{ m}^3$ )

| District / county | TP GWF in 2019 | TP GWF in 2018 | TN GWF in 2019 | TN GWF in 2018 |
|-------------------|----------------|----------------|----------------|----------------|
| Jingyang          | 21.45          | 21.64          | 9.07           | 8.62           |
| Guanghan          | 44.24          | 37.11          | 14.71          | 14.79          |
| Shifang           | 31.38          | 27.82          | 13.17          | 14.24          |
| Mianzhu           | 29.65          | 25.23          | 14.72          | 14.80          |
| Pengzhou          | 32.85          | 28.53          | 11.46          | 11.26          |
| Xindu             | 16.60          | 14.42          | 5.35           | 5.69           |

|              |        |        |        |        |
|--------------|--------|--------|--------|--------|
| Qingbaijiang | 12.23  | 10.63  | 3.94   | 4.19   |
| Jingtang     | 36.60  | 31.79  | 11.79  | 12.55  |
| Longquanyi   | 5.11   | 4.44   | 1.65   | 1.75   |
| Jianyang     | 69.55  | 60.41  | 22.40  | 23.84  |
| Yanjiang     | 31.26  | 26.03  | 17.87  | 18.25  |
| Anyue        | 27.92  | 23.40  | 11.18  | 11.23  |
| Lezhi        | 10.89  | 9.39   | 14.65  | 15.06  |
| Renshou      | 93.13  | 80.91  | 37.19  | 38.77  |
| Shizhong     | 11.80  | 11.03  | 3.72   | 4.27   |
| Dongxin      | 51.33  | 43.88  | 29.85  | 30.71  |
| Weiyaun      | 31.17  | 26.29  | 13.62  | 16.06  |
| Longchang    | 12.92  | 12.63  | 7.98   | 9.46   |
| Zizhong      | 64.19  | 65.00  | 27.20  | 29.26  |
| Ziliujing    | 5.38   | 4.64   | 1.73   | 1.80   |
| Gongjing     | 18.70  | 18.54  | 5.55   | 5.87   |
| Da,an        | 13.57  | 11.58  | 6.33   | 6.40   |
| Yantan       | 25.01  | 21.38  | 10.11  | 10.27  |
| Rongxian     | 49.94  | 42.10  | 13.12  | 13.24  |
| Fushun       | 54.56  | 45.98  | 14.70  | 14.94  |
| Jiangyang    | 15.03  | 19.23  | 8.85   | 10.50  |
| Longmatan    | 10.22  | 8.64   | 4.23   | 4.30   |
| Luxian       | 50.45  | 43.01  | 24.66  | 25.52  |
| Total        | 877.12 | 775.66 | 360.77 | 377.64 |

Table S5 TN and TP GWF of living source in the TJRB ( $10^9 \text{ m}^3$ )

| District/<br>county | TN GWF in 2019 | TP GWF in 2019 | TN GWF in 2018 | TP GWF in 2018 |
|---------------------|----------------|----------------|----------------|----------------|
| Jingyang            | 2.02           | 0.31           | 2.11           | 0.32           |
| Guanghan            | 3.18           | 0.48           | 3.24           | 0.49           |
| Shifang             | 2.26           | 0.34           | 2.31           | 0.35           |
| Mianzhu             | 2.72           | 0.41           | 2.73           | 0.41           |
| Pengzhou            | 3.16           | 0.48           | 3.26           | 0.49           |
| Xindu               | 1.97           | 0.30           | 2.09           | 0.32           |
| Qingbaijiang        | 1.41           | 0.21           | 1.42           | 0.21           |
| Jingtang            | 4.69           | 0.71           | 4.69           | 0.71           |
| Longquanyi          | 2.02           | 0.31           | 2.05           | 0.31           |
| Jianyang            | 3.41           | 0.52           | 6.85           | 1.04           |

|           |        |       |        |       |
|-----------|--------|-------|--------|-------|
| Yanjiang  | 6.52   | 0.99  | 6.39   | 0.97  |
| Anyue     | 10.13  | 1.54  | 10.34  | 1.57  |
| Lezhi     | 5.54   | 0.84  | 5.56   | 0.84  |
| Renshou   | 11.08  | 1.68  | 11.39  | 1.73  |
| Shizhong  | 1.75   | 0.27  | 1.82   | 0.28  |
| Dongxin   | 4.76   | 0.72  | 4.80   | 0.73  |
| Weiyaun   | 4.10   | 0.62  | 4.12   | 0.62  |
| Longchang | 8.31   | 1.26  | 8.42   | 1.28  |
| Zizhong   | 4.41   | 0.67  | 4.45   | 0.67  |
| Ziliujing | 0.52   | 0.08  | 0.53   | 0.08  |
| Gongjing  | 1.49   | 0.23  | 1.54   | 0.23  |
| Da'an     | 2.30   | 0.35  | 2.32   | 0.35  |
| Yantan    | 2.52   | 0.38  | 2.60   | 0.39  |
| Rongxian  | 4.47   | 0.68  | 4.56   | 0.69  |
| Fushun    | 6.43   | 0.97  | 6.60   | 1.00  |
| Jiangyang | 2.72   | 0.41  | 2.75   | 0.42  |
| Longmatan | 0.75   | 0.11  | 0.78   | 0.12  |
| Luxian    | 7.54   | 1.14  | 7.40   | 1.12  |
| Total     | 112.18 | 17.00 | 117.13 | 17.75 |

Table S6 TN and TP GWF of poultry and livestock farming source in the TJRB ( $10^9 \text{ m}^3$ )

| District/<br>county | TN GWF in 2019 | TP GWF in 2019 | TN GWF in 2018 | TP GWF in 2018 |
|---------------------|----------------|----------------|----------------|----------------|
| Jingyang            | 6.71           | 8.23           | 6.35           | 7.79           |
| Guanghan            | 4.46           | 5.46           | 4.79           | 5.87           |
| Shifang             | 2.30           | 2.82           | 2.67           | 3.28           |
| Mianzhu             | 2.92           | 3.58           | 3.57           | 4.37           |
| Pengzhou            | 3.04           | 3.73           | 3.55           | 4.35           |
| Xindu               | 1.21           | 1.48           | 1.96           | 2.41           |
| Qingbaijiang        | 0.87           | 1.07           | 0.73           | 0.90           |
| Jingtang            | 4.02           | 4.92           | 5.78           | 7.08           |
| Longquanyi          | 0.73           | 0.90           | 1.37           | 1.67           |
| Jianyang            | 4.83           | 5.92           | 6.12           | 7.50           |
| Yanjiang            | 5.32           | 6.53           | 6.86           | 8.41           |
| Anyue               | 7.83           | 9.60           | 9.93           | 12.17          |
| Lezhi               | 5.13           | 6.29           | 7.12           | 8.73           |
| Renshou             | 7.59           | 9.30           | 8.50           | 10.42          |

|           |       |        |        |        |
|-----------|-------|--------|--------|--------|
| Shizhong  | 1.44  | 1.76   | 1.62   | 1.99   |
| Dongxin   | 4.29  | 5.26   | 4.83   | 5.92   |
| Weiyaun   | 3.47  | 4.25   | 3.72   | 4.56   |
| Longchang | 4.99  | 6.12   | 5.23   | 6.41   |
| Zizhong   | 3.68  | 4.51   | 3.71   | 4.55   |
| Ziliujing | 0.42  | 0.51   | 0.45   | 0.55   |
| Gongjing  | 1.12  | 1.37   | 1.26   | 1.54   |
| Da,an     | 2.31  | 2.83   | 1.87   | 2.29   |
| Yantan    | 1.08  | 1.33   | 1.16   | 1.43   |
| Rongxian  | 4.08  | 5.00   | 4.48   | 5.49   |
| Fushun    | 3.76  | 4.61   | 4.77   | 5.84   |
| Jiangyang | 1.94  | 2.38   | 2.40   | 2.94   |
| Longmatan | 1.54  | 1.89   | 1.48   | 1.82   |
| Luxian    | 7.55  | 9.25   | 7.86   | 9.63   |
| Total     | 98.60 | 120.88 | 114.12 | 139.90 |

Table S7 TN and TP GWF of ANPS in the TJRB (10<sup>9</sup> m<sup>3</sup>)

| District/<br>county | TP GWF in 2019 | TP GWF in 2018 | TN GWF in 2019 | TN GWF in 2018 |
|---------------------|----------------|----------------|----------------|----------------|
| Jingyang            | 31.21          | 31.02          | 17.80          | 17.08          |
| Guanghan            | 52.11          | 45.44          | 22.35          | 22.82          |
| Shifang             | 35.91          | 32.85          | 17.73          | 19.22          |
| Mianzhu             | 35.29          | 31.67          | 20.35          | 21.10          |
| Pengzhou            | 38.97          | 35.35          | 17.66          | 18.07          |
| Xindu               | 19.58          | 18.41          | 8.53           | 9.74           |
| Qingbaijiang        | 14.37          | 12.60          | 6.22           | 6.35           |
| Jingtang            | 45.08          | 42.42          | 20.49          | 23.01          |
| Longquanyi          | 7.54           | 7.67           | 4.40           | 5.17           |
| Jianyang            | 78.05          | 73.10          | 30.64          | 36.81          |
| Yanjiang            | 42.72          | 39.28          | 29.71          | 31.50          |
| Anyue               | 45.20          | 43.40          | 29.14          | 31.49          |
| Lezhi               | 21.38          | 22.32          | 25.32          | 27.74          |
| Renshou             | 110.83         | 99.95          | 55.86          | 58.65          |
| Shizhong            | 14.89          | 14.40          | 6.91           | 7.71           |
| Dongxin             | 60.19          | 53.44          | 38.90          | 40.34          |

|           |         |         |        |        |
|-----------|---------|---------|--------|--------|
| Weiyaun   | 38.52   | 33.97   | 21.19  | 23.90  |
| Longchang | 25.33   | 25.42   | 21.28  | 23.11  |
| Zizhong   | 72.03   | 72.92   | 35.28  | 37.42  |
| Ziliujing | 6.29    | 5.59    | 2.67   | 2.78   |
| Gongjing  | 21.20   | 21.25   | 8.16   | 8.67   |
| Da,an     | 18.14   | 15.63   | 10.94  | 10.59  |
| Yantan    | 28.24   | 24.78   | 13.71  | 14.03  |
| Rongxian  | 58.33   | 51.05   | 21.66  | 22.28  |
| Fushun    | 64.04   | 56.82   | 24.88  | 26.31  |
| Jiangyang | 19.47   | 24.26   | 13.51  | 15.65  |
| Longmatan | 12.68   | 11.05   | 6.52   | 6.55   |
| Luxian    | 65.41   | 58.25   | 39.75  | 40.78  |
| Total     | 1083.00 | 1004.30 | 571.55 | 608.89 |
